# Supplementary material for: AIPE-active cationic Ir(iii) complexes for efficient detection of 2,4,6-trinitrophenol and oxygen
Source: Royal Society of Chemistry journal article supplement (doi:10.1039/d2dt03537e), 2022-11-17
Supplement: d2dt03537e1.pdf [file d2dt03537e1.pdf]

*ESI for*

**AIPE-active cationic Ir(III) complexes for efficient detection of 2,4,6-trinitrophenol and oxygen**

Ping He,<sup>a</sup> Yan Chen,<sup>a</sup> Xiao-Na Li,<sup>b</sup> Ying-Ying Yan<sup>a</sup> and Chun Liu<sup>\*a</sup>

<sup>a</sup> State Key Laboratory of Fine Chemicals, Frontier Science Center for Smart Materials, School of Chemical Engineering, Dalian University of Technology, Dalian 116024, China. E-mail: cliu@dlut.edu.cn

<sup>b</sup> School of Environmental Science and Technology, Key Laboratory of Industrial Ecology and Environmental Engineering (MOE), Dalian University of Technology, Liaoning 116024, China

**Contents**

|                                                                      |                |
|----------------------------------------------------------------------|----------------|
| <b>Phosphorescence decay traces of Ir(III) complexes</b>             | <b>S2</b>      |
| <b>Electrochemical properties of Ir(III) complexes</b>               | <b>S2</b>      |
| <b>Luminescence properties of Ir(III) complexes</b>                  | <b>S2-S3</b>   |
| <b>Crystal information for Ir2</b>                                   | <b>S4-S6</b>   |
| <b>Previously reported TNP sensors</b>                               | <b>S7</b>      |
| <b>Synthesis of the Ir(III) complex Ir-ppy-dpa for TNP detection</b> | <b>S8</b>      |
| <b>Calculation of detection limits of Ir(III) complexes.</b>         | <b>S9-S10</b>  |
| <b>HRMS analysis</b>                                                 | <b>S10</b>     |
| <b>Previously reported OSPs</b>                                      | <b>S11-S12</b> |
| <b>The reversibility for sensing oxygen of Ir1</b>                   | <b>S13</b>     |
| <b>NMR and HRMS spectra of complexes Ir1 and Ir2</b>                 | <b>S14-S16</b> |

## Phosphorescence decay traces of Ir(III) complexes.

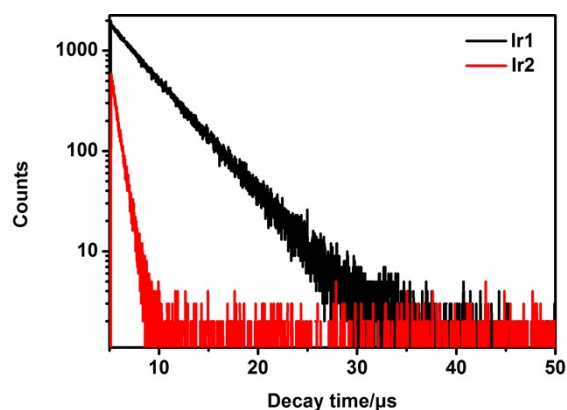

Fig. S1 Phosphorescence decay traces of Ir1 and Ir2 in deoxygenated CH<sub>2</sub>Cl<sub>2</sub>.

## Electrochemical properties of Ir(III) complexes.

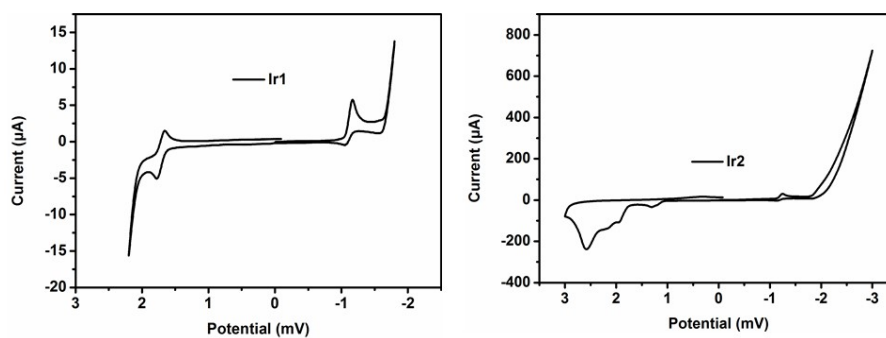

Fig. S2 Cyclic voltammograms of Ir1 and Ir2 in deoxygenated CH<sub>2</sub>Cl<sub>2</sub> at room temperature.

## Luminescence properties of Ir(III) complexes

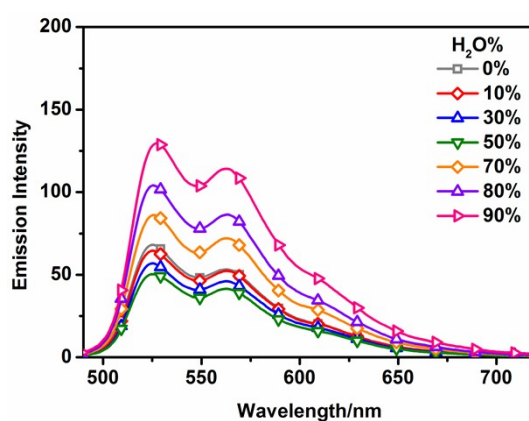

Fig. S3 The emission spectra of complex Ir1 in H<sub>2</sub>O/CH<sub>3</sub>CN with different H<sub>2</sub>O fractions (0-90% v/v).

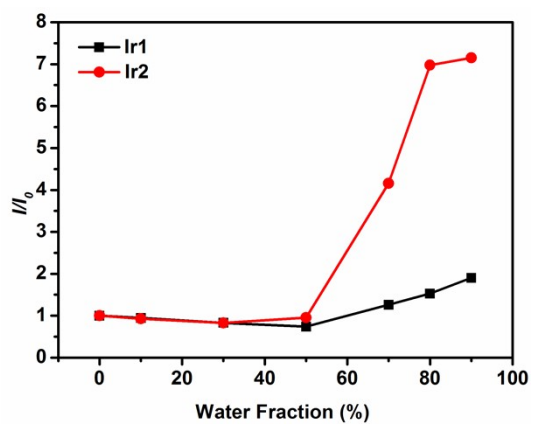

**Fig. S4** Plots of relative intensity vs. different water fractions for **Ir1** and **Ir2** at the maximum emission wavelength ( $I_0$  represents the emission intensity of the complex in MeCN,  $I$  represents the emission intensity under corresponding content of water).

## Crystal information for Ir2.

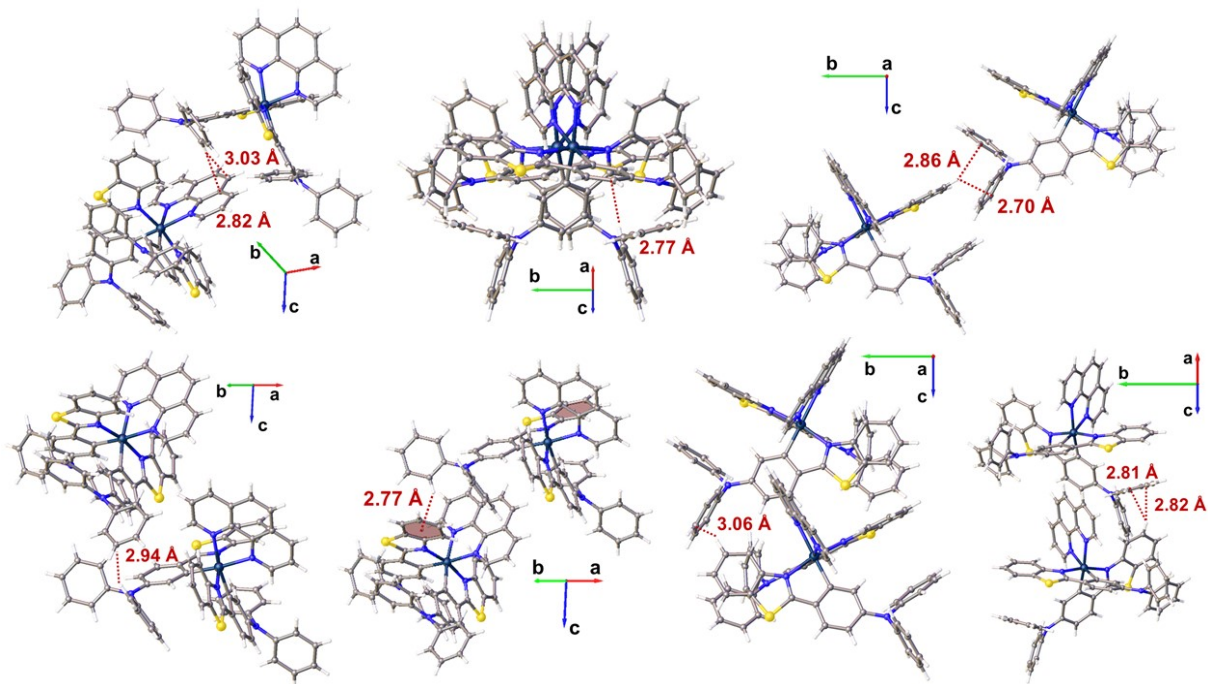

Fig. S5 The C-H... $\pi$  intermolecular interactions of Ir2 in the single crystal.

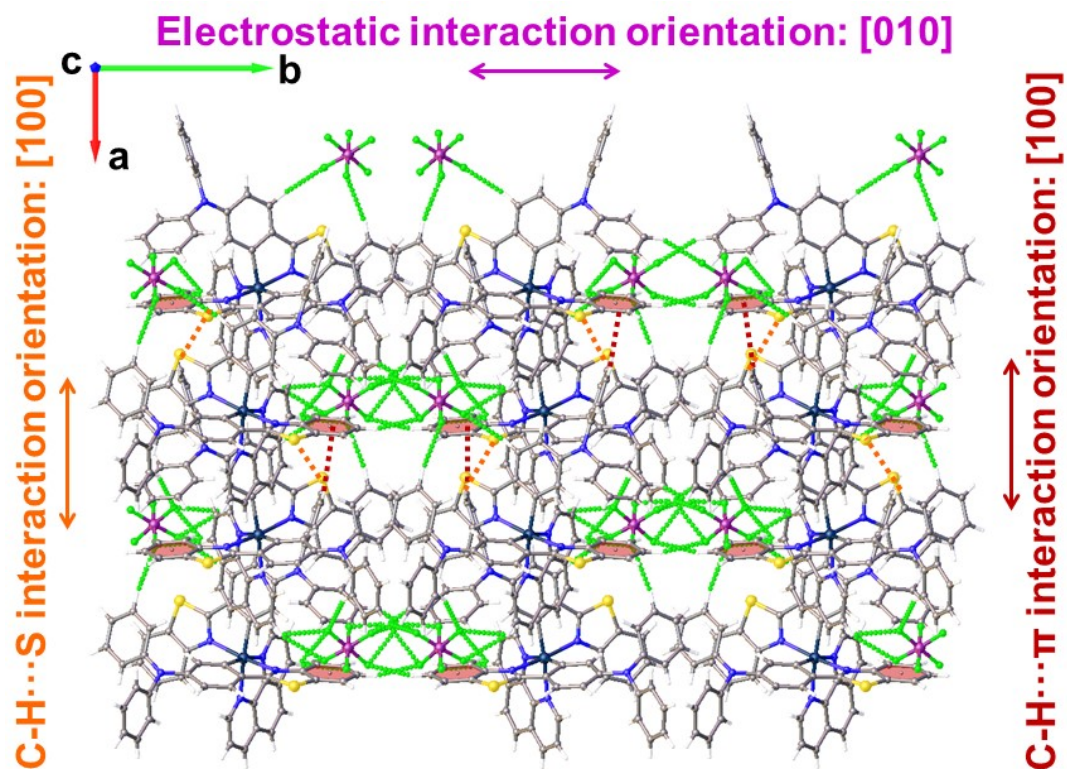

Fig. S6 The molecular stacking of Ir2 in crystal state (orange dashed lines: C-H...S hydrogen bonds; wine red dashed lines: C-H... $\pi$  intermolecular interactions; green dashed lines: C-H...F intermolecular interactions).

**Tab. S1** Crystal data of **Ir2**.

| Complex                                          | <b>Ir2</b>                                                                      |
|--------------------------------------------------|---------------------------------------------------------------------------------|
| <b>Formula</b>                                   | C <sub>62</sub> H <sub>42</sub> F <sub>6</sub> IrN <sub>6</sub> PS <sub>2</sub> |
| <b>Formula weight</b>                            | 1272.30                                                                         |
| <b>Crystal system</b>                            | Monoclinic                                                                      |
| <b>Temperature</b>                               | 200 K                                                                           |
| <b>Space Group</b>                               | Cc                                                                              |
| <b>Cell Lengths (Å)</b>                          | a = 12.5282(6)                                                                  |
|                                                  | b = 29.0665(14)                                                                 |
|                                                  | c = 15.1236(8)                                                                  |
| <b>Cell Angles (°)</b>                           | α = 90                                                                          |
|                                                  | β = 92.8930(17)                                                                 |
| <b>Cell Volume (Å<sup>3</sup>)</b>               | 5500.3(5)                                                                       |
| <b>Z</b>                                         | 4                                                                               |
| <b>Density (g/cm<sup>3</sup>)</b>                | 1.536                                                                           |
| <b>F (000)</b>                                   | 2536.0                                                                          |
| <b>hmax, kmax, lmax</b>                          | 14, 34, 17                                                                      |
| <b>Tmin, Tmax</b>                                | 0.684, 0.751                                                                    |
| <b>Absorption coefficient/mm<sup>-1</sup></b>    | 2.599                                                                           |
| <b>R(int)</b>                                    | 0.0467                                                                          |
| <b>Data/restraints/parameters</b>                | 9575/2/704                                                                      |
| <b>Goodness-of-fit on F<sup>2</sup></b>          | 1.022                                                                           |
| <b>R<sub>1</sub><sup>a</sup> [I &gt; 2σ(I)]</b>  | 0.0305                                                                          |
| <b>wR<sub>2</sub><sup>b</sup> [I &gt; 2σ(I)]</b> | 0.0630                                                                          |
| <b>R<sub>1</sub><sup>a</sup> (all data)</b>      | 0.0374                                                                          |
| <b>wR<sub>2</sub><sup>b</sup> (all data)</b>     | 0.0645                                                                          |
| <b>CCDC</b>                                      | 2170691                                                                         |

$${}^{[a]}R_1 = \sum || F_o | - | F_c || / \sum | F_o |$$

$${}^{[b]}wR_2 = [\sum w(F_o^2 - F_c^2)^2 / \sum w(F_o^2)^2]^{1/2}$$

**Tab. S2** The distances and angles of the C-H $\cdots$ S intermolecular interactions in **Ir2** crystal (see Fig. 2c).

| Complex    | Type           | Distance/Å | Angle/° |
|------------|----------------|------------|---------|
| <b>Ir2</b> | C-H $\cdots$ S | 3.24       | 127.79  |

**Tab. S3** The distances of the C-H $\cdots$  $\pi$  intermolecular interactions in **Ir2** crystal (see Fig. 2c and Fig. S4).

| Complex    | Type               | Distances/Å |
|------------|--------------------|-------------|
| <b>Ir2</b> | C-H $\cdots$ $\pi$ | 2.66        |
|            |                    | 2.70        |
|            |                    | 2.77        |
|            |                    | 2.81        |
|            |                    | 2.82        |
|            |                    | 2.86        |
|            |                    | 2.94        |
|            |                    | 3.03        |
| 3.06       |                    |             |

**Tab. S4** The distances and angles of the C-H $\cdots$ F intermolecular interactions in **Ir2** crystal (see Fig. 2d).

| Complex    | Type           | Distance/Å | Angle/° |
|------------|----------------|------------|---------|
| <b>Ir2</b> | C-H $\cdots$ F | 2.54       | 152.32  |
|            |                | 2.60       | 169.83  |
|            |                | 2.88       | 168.49  |
|            |                | 2.68       | 153.58  |
|            |                | 2.73       | 129.60  |
|            |                | 2.90       | 142.22  |

Previously reported TNP sensors.

Tab. S5 Some Ir(III) complexes are used as TNP sensors and their  $K_{SV}$

| Ir(III) complex                                                                     | Solvent                                | $K_{SV}$                | References |
|-------------------------------------------------------------------------------------|----------------------------------------|-------------------------|------------|
| 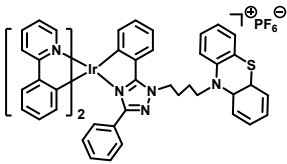   | Acetone/H <sub>2</sub> O (v/v = 1 : 9) | 52800 M <sup>-1</sup>   | [1]        |
|    | MeCN/H <sub>2</sub> O (v/v = 1 : 9)    | 1600000 M <sup>-1</sup> | [2]        |
|    | THF/H <sub>2</sub> O (v/v = 1 : 9)     | 190000 M <sup>-1</sup>  | [3]        |
|    | MeCN/H <sub>2</sub> O (v/v = 1 : 9)    | 3790000 M <sup>-1</sup> | [4]        |
|   | MeCN/H <sub>2</sub> O (v/v = 1 : 9)    | 166000 M <sup>-1</sup>  | [5]        |
|  | MeCN/H <sub>2</sub> O (v/v = 1 : 9)    | 32200 M <sup>-1</sup>   | [6]        |
|  | MeCN/H <sub>2</sub> O (v/v = 1 : 9)    | 2644330 M <sup>-1</sup> | This work  |

## Synthesis of the Ir(III) complex Ir-ppy-dpa for TNP detection

**Ir-ppy-dpa** was prepared following the reported method (*Mater. Chem. Front.*, 2019, 3, 1593-1600).  $\text{IrCl}_3 \cdot 3\text{H}_2\text{O}$  (0.2 mmol, 70.5 mg) and cyclometalating ligand (0.5 mmol, 161.2 mg,) were added in a mixture of 2-ethoxyethanol (6 mL) and water (2 mL). The mixture was then heated to reflux for 24 h under the  $\text{N}_2$  atmosphere. After being cooled to room temperature, the solvent was removed in vacuum and the crude product was used for the next step without purification. The dimeric Ir(III) complex reacted with 3.0 equiv. of the 1,10-phenanthroline (0.6 mmol, 108.1 mg) in 2-ethoxyethanol at  $120^\circ\text{C}$  under nitrogen for 24 h. After cooling to room temperature, a 10-fold excess of saturated  $\text{KPF}_6$  solution was added and stirred for 2 h. The reaction mixture was added to water (15 mL) and extracted with dichloromethane. The product was isolated by column chromatography.

**Ir-ppy-dpa.**  $^1\text{H}$  NMR (400 MHz,  $\text{DMSO-}d_6$ ):  $\delta$  8.89 (dd,  $J = 8.2, 1.2$  Hz, 2H), 8.42 - 8.32 (m, 4H), 8.13 (dd,  $J = 8.2, 5.1$  Hz, 2H), 7.80 (d,  $J = 8.3$  Hz, 2H), 7.72 (d,  $J = 8.7$  Hz, 2H), 7.49 - 7.42 (m, 2H), 7.25 (t,  $J = 7.9$  Hz, 8H), 7.05 (t,  $J = 7.4$  Hz, 6H), 6.98 (d,  $J = 7.6$  Hz, 8H), 6.55 (dd,  $J = 8.6, 2.3$  Hz, 2H), 6.53 - 6.46 (m, 2H), 5.88 (d,  $J = 2.3$  Hz, 2H).

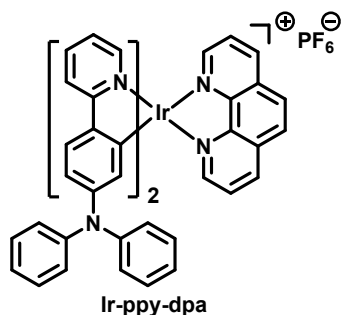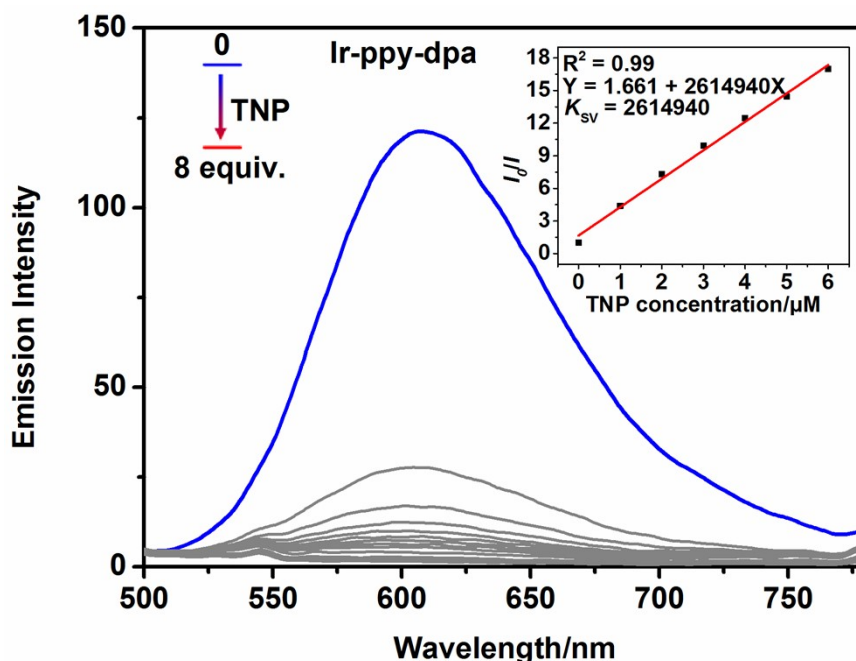

Fig. S7 Structure and emission spectra of Ir-ppy-dpa at  $10 \mu\text{M}$  in  $\text{H}_2\text{O}/\text{CH}_3\text{CN}$  ( $v/v = 9:1$ ) with



different concentrations of TNP ( $K_{SV} = 2614940 \text{ M}^{-1}$ ).

### Calculation of detection limits of Ir(III) complexes.

The detection limits of **Ir1**, **Ir2** and **Ir-ppy-dpa** were calculated according to the following equation  $\text{LOD} = 3\sigma/K$  ( $\sigma$  represents the standard deviation of the blank measurement,  $K$  represents the slope of the linear regression). The detection limits of **Ir1**, **Ir2** and **Ir-ppy-dpa** for TNP were calculated to be 50.17 nM, 2.23 nM and 19.75 nM, respectively.

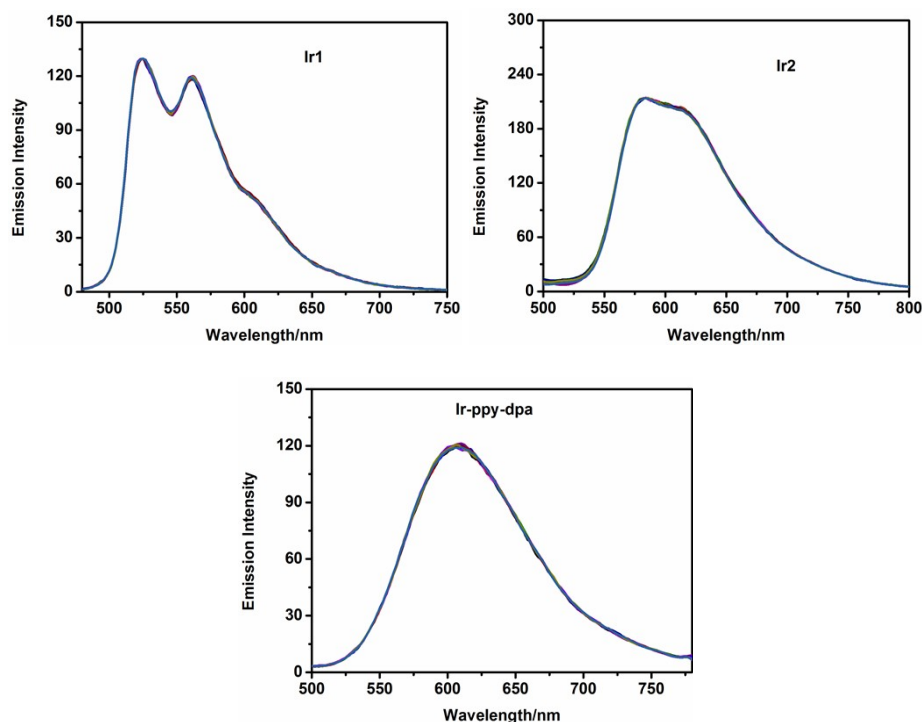

**Fig. S8** The blank measurements of **Ir1**, **Ir2** and **Ir-ppy-dpa** for eleven times in  $\text{H}_2\text{O}/\text{CH}_3\text{CN}$  ( $v/v = 9:1$ ,  $10 \mu\text{M}$ ).

**Tab. S6** The emission intensity of **Ir1** at 525 nm, **Ir2** at 583 nm and **Ir-ppy-dpa** 607 nm in eleven times in  $\text{H}_2\text{O}/\text{CH}_3\text{CN}$  ( $v/v = 9:1$ ,  $10 \mu\text{M}$ )

| Complexes         | $X_1$  | $X_2$  | $X_3$  | $X_4$  | $X_5$  | $X_6$  | $X_7$  | $X_8$  | $X_9$  | $X_{10}$ | $X_{11}$ | $\bar{X}$ |
|-------------------|--------|--------|--------|--------|--------|--------|--------|--------|--------|----------|----------|-----------|
| <b>Ir1</b>        | 129.69 | 129.49 | 129.44 | 129.68 | 129.57 | 129.65 | 129.71 | 129.44 | 129.70 | 129.62   | 129.73   | 129.61    |
| <b>Ir2</b>        | 213.94 | 213.89 | 214.00 | 213.92 | 213.92 | 213.97 | 213.76 | 213.67 | 213.93 | 213.64   | 213.73   | 213.85    |
| <b>Ir-ppy-dpa</b> | 120.65 | 120.52 | 120.16 | 120.12 | 120.03 | 119.59 | 119.92 | 119.19 | 119.15 | 119.09   | 118.94   | 119.76    |

The values of  $\sigma$  for **Ir1**, **Ir2** and **Ir-ppy-dpa** were calculated according to the following equation:

$$\sigma = [\sum(X_i - \bar{X})^2 / (n-1)]^{0.5}$$

$X_i$  ( $i = 1, 2, 3 \dots 11$ ) represents the emission intensity of each test,  $\bar{X}$  represents the mean value of the emission intensity,  $n$  represents the number of tests.

According to the above formula, the values of  $\sigma$  for **Ir1**, **Ir2** and **Ir-ppy-dpa** were calculated to be 0.1092, 0.1272 and 0.6004, respectively.

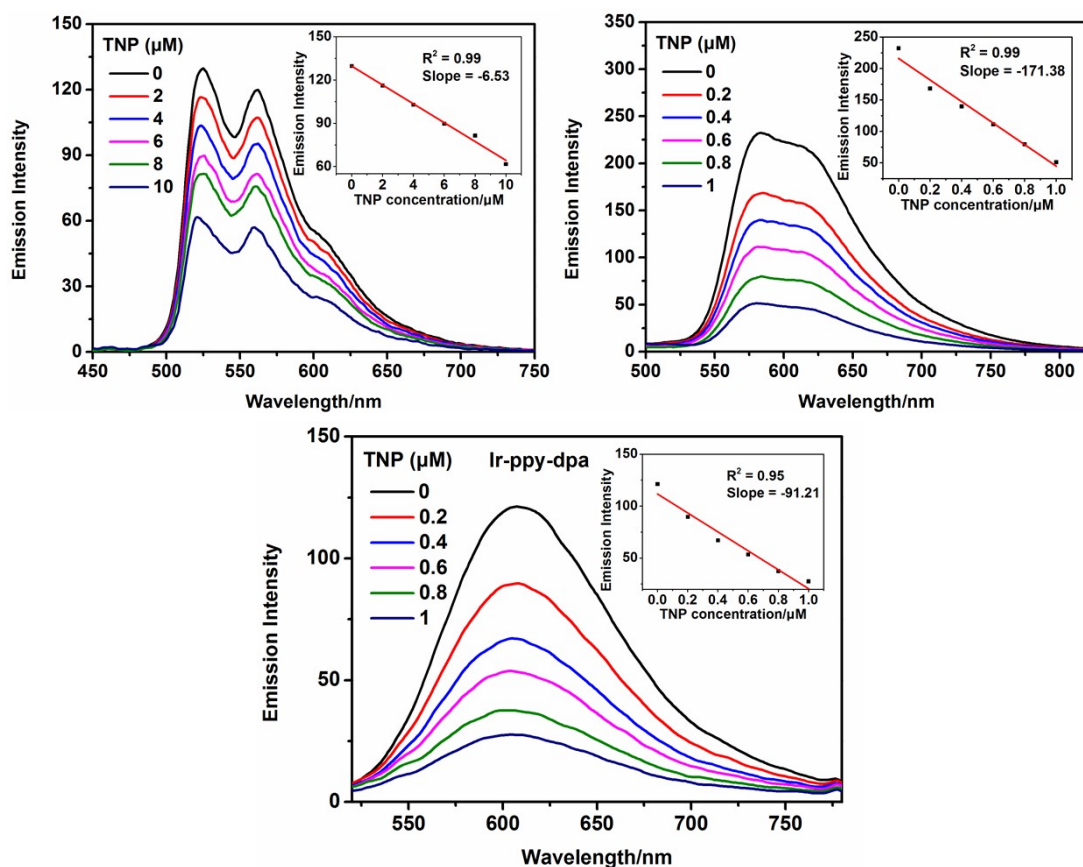

**Fig. S9** The emission spectra of **Ir1**, **Ir2** and **Ir-ppy-dpa** at 10  $\mu\text{M}$  in  $\text{H}_2\text{O}/\text{CH}_3\text{CN}$  ( $v/v = 9:1$ ) with different concentrations of TNP. Insert: the slope of the linear regression.

### HRMS analysis.

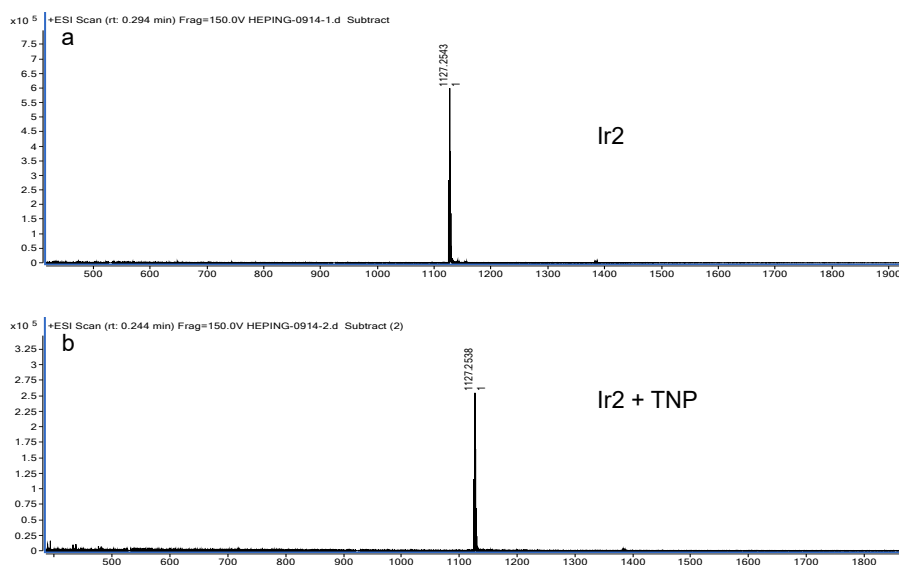

**Fig. S10** HRMS of the cationic portion of **Ir2** before (a) and after (b) addition of TNP.

## Previously reported OSPs.

**Tab. S7** Some Ir(III) complexes used as oxygen-sensitive probes and their oxygen sensitivity

| OSP                                                                                 | Matrix                | $I_0/I_{100}$ | References |
|-------------------------------------------------------------------------------------|-----------------------|---------------|------------|
| 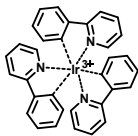   | poly(styrene-co-TFEM) | 15.3          | [7]        |
|    | Polystyrene           | 2.4           | [8]        |
|    | FIB                   | 7.4           | [9]        |
|   | Ethyl cellulose       | 7.3           | [10]       |
|  | Ethyl cellulose       | 5.8           | [11]       |
|  | Ethyl cellulose       | 16.4          | [12]       |
|  | Polystyrene           | 12.9          | [13]       |
|  | Ethyl cellulose       | 6.2           | [14]       |
|  | Ethyl cellulose       | 25.4          | This work  |

## References

- [1] X. Hou, Y. Wu, H. Cao, H. Sun, H. Li, G. Shan and Z. Su, *Chem. Commun.*, 2014, **50**, 6031-6034.
- [2] Y. Han, H. Cao, H. Sun, G. Shan, Y. Wu, Z. Su and Y. Liao, *J. Mater. Chem. C*, 2015, **3**, 2341-2349.
- [3] P. Alam, G. Kaur, V. Kachwal, A. Gupta, A. Roy Choudhury and I.R. Laskar, *J. Mater. Chem. C*, 2015, **3**, 5450-5456.
- [4] L. Wen, X. Hou, G. Shan, W. Song, S. Zhang, H. Sun and Z. Su, *J. Mater. Chem. C*, 2017, **5**, 10847-10854.
- [5] W. Che, G. Li, X. Liu, K. Shao, D. Zhu, Z. Su and M. R. Bryce, *Chem. Commun.*, 2018, **54**, 1730-1733.
- [6] S. Yi, Z. Lu, Z. Xie and L. Hou, *Talanta*, 2020, **208**, 120372.
- [7] Y. Amao, Y. Ishikawa and I. Okura, *Anal. Chim. Acta*, 2001, **445**, 177-182.
- [8] J.F. Fernández-Sánchez, T. Roth, R. Cannas, M.K. Nazeeruddin, S. Spichiger, M. Graetzel and U.E. Spichiger-Keller, *Talanta*, 2007, **71**, 242-250.
- [9] B. Carlson, B.E. Eichinger, W. Kaminsky and G. D. Phelan, *Sens. Actuators, B*, 2010, **145**, 278-284.
- [10] C. Liu, H. Yu, Y. Xing, Z. Gao and Z. Jin, *Dalton Trans.*, 2016, **45**, 734-741.
- [11] C. Liu, X. Lv, Y. Xing and J. Qiu, *J. Mater. Chem. C*, 2015, **3**, 8010-8017.
- [12] C. Liu, H. Yu, X. Rao, X. Lv, Z. Jin and J. Qiu, *Dyes Pigm.*, 2017, **136**, 641-647.
- [13] R. Kai, W. Jun and J. Huali, *Sens. Actuators, B*, 2017, **240**, 697-708.
- [14] M. Zeyrek Ongun, M. Sahin, T. Akbal, N. Avsar, H. Karakas, K. Ertekin, D. Atilla, H. İbişoğlu and S.Z. Topal, *Spectrochim. Acta, Part A*, 2020, **239**, 118490.

## The reversibility for sensing oxygen of Ir1.

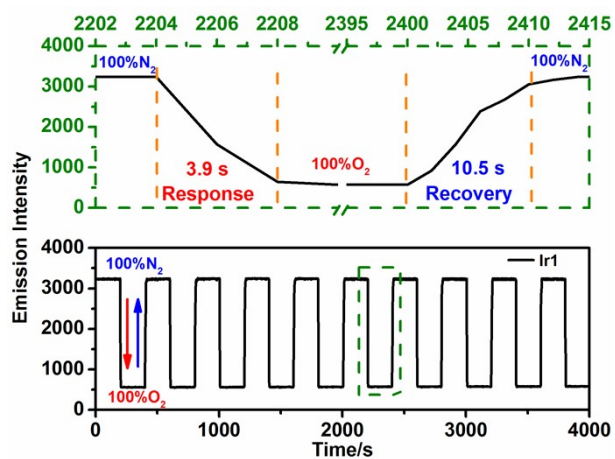

**Fig. S11** Reversibility and emission intensity response of sensing film of **Ir1** immobilized in EC when cycling from 100% N<sub>2</sub> to 100% O<sub>2</sub>.

## NMR and HRMS spectra of complexes Ir1 and Ir2.

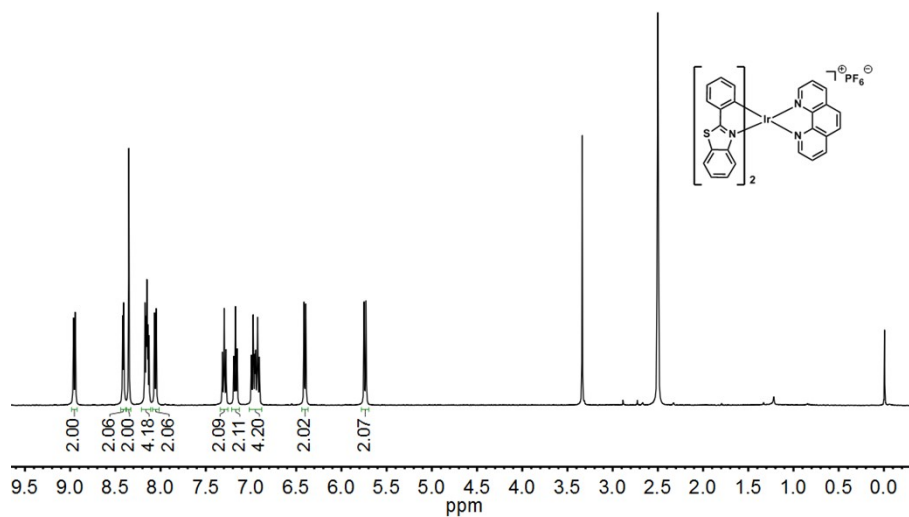

**Fig. S12.** The  $^1\text{H}$  NMR spectrum of Ir1 in  $\text{DMSO-}d_6$ .

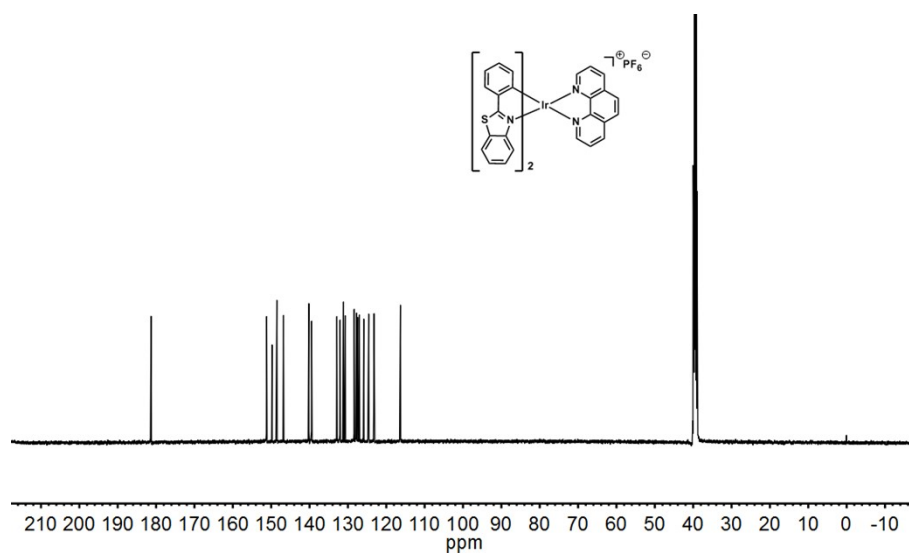

**Fig. S13.** The  $^{13}\text{C}$  NMR spectrum of Ir1 in  $\text{DMSO-}d_6$ .

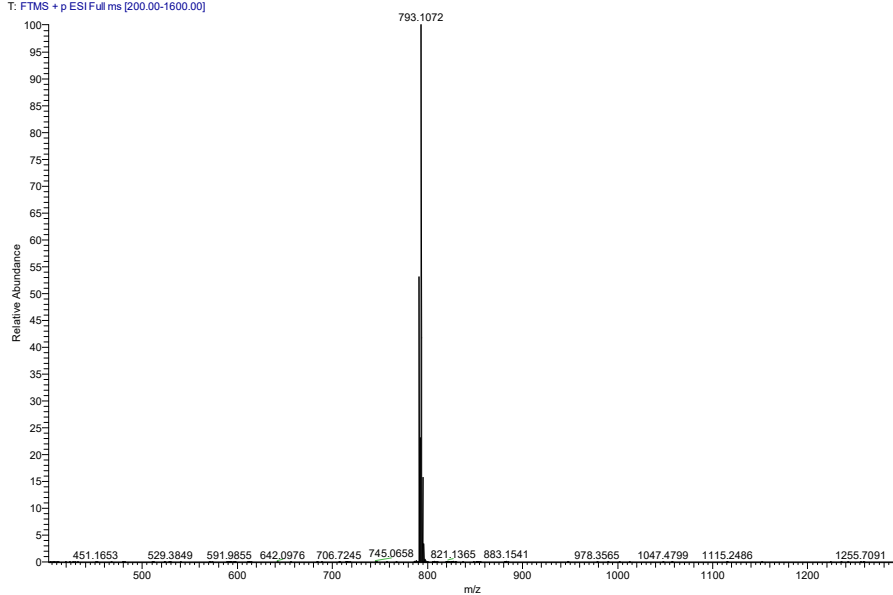

Fig. S14. The HRMS spectrum of the cationic portion of Ir1.

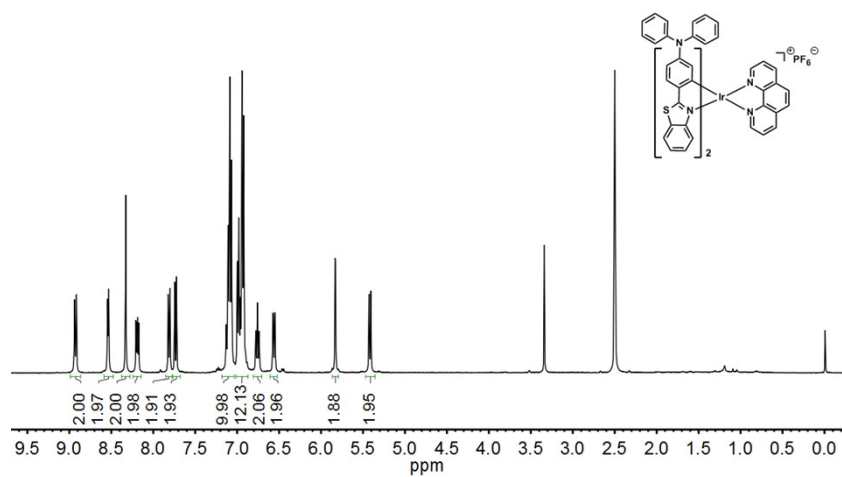

Fig. S15 <sup>1</sup>H NMR spectrum of Ir2 in DMSO-*d*<sub>6</sub>.

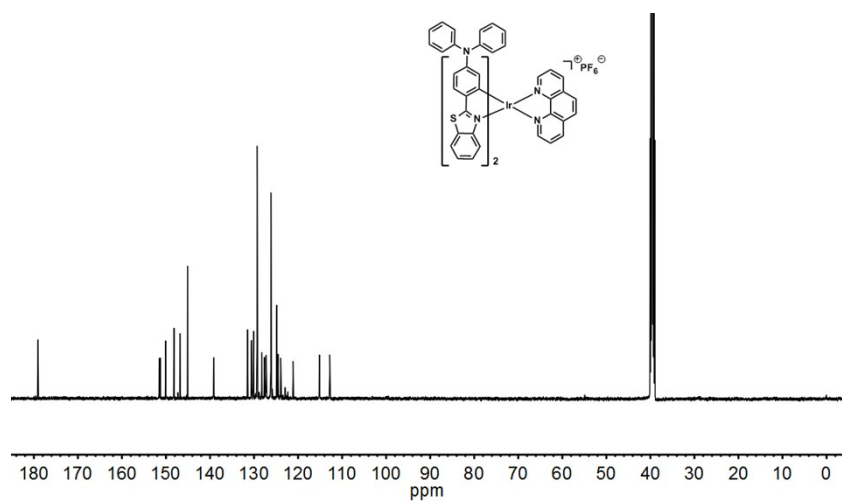

Fig. S16 <sup>13</sup>C NMR spectrum of Ir2 in DMSO-*d*<sub>6</sub>.

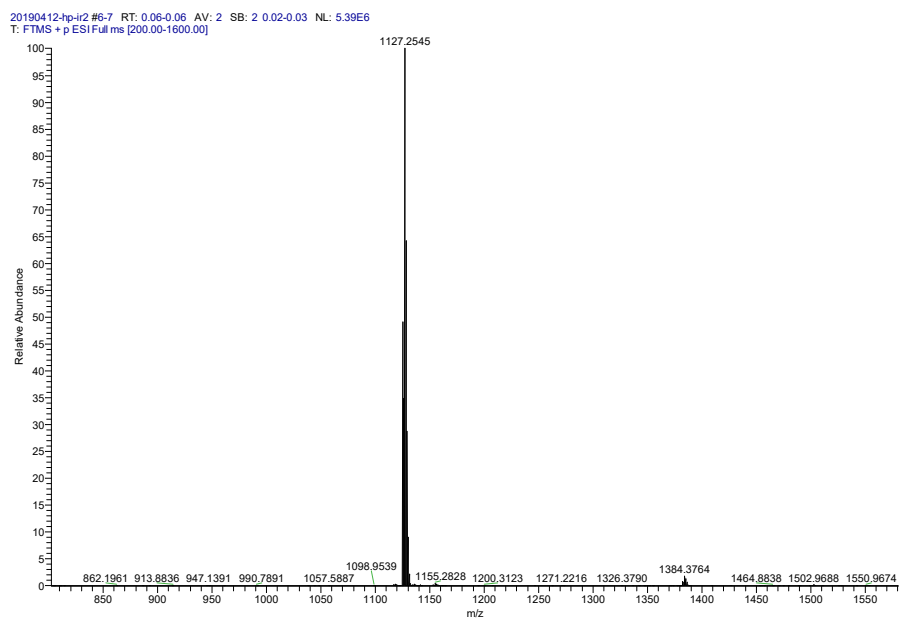

**Fig. S17** The HRMS spectrum of the cationic portion of **Ir2**.
